# Supplementary material
Source: Springer Nature journal article supplement (https://www.springermedizin.de/resource/supplementary/12872_2014_820_MOESM1_ESM.pdf/9430494)
Supplement: MOESM1 [file 9430494]

**Revisiting the J shaped curve, exploring the association between cardiovascular risk factors and concurrent depressive symptoms in patients with cardiometabolic disease: Findings from a large cross-sectional study.**

**Supplement 1 - Additional Analysis**

**Table 1 Title: Comparison of demographic characteristics and distribution of clinical risk factors between total population (n=125143) with the subset which underwent depression screening (n=35537)**

| <i>Mean (SD) and median (IQR) are presented for continuous variables and count (%) for categorical.</i> |              |                                 |                                   |
|---------------------------------------------------------------------------------------------------------|--------------|---------------------------------|-----------------------------------|
|                                                                                                         |              | Total<br>Population<br>n=125143 | Screened<br>Population<br>n=35537 |
| <b>Age (years)</b>                                                                                      | 18-64        | 47711 (38.13%)                  | 11553 (32.52%)                    |
|                                                                                                         | 65-90        | 77390 (62.87%)                  | 23973 (67.48%)                    |
|                                                                                                         | missing      | 42                              | 11                                |
| <b>Sex</b>                                                                                              | Female       | 57566 (46.03%)                  | 14861 (41.84%)                    |
|                                                                                                         | Male         | 67507 (53.97%)                  | 20658 (58.16%)                    |
|                                                                                                         | missing      | 70                              | 18                                |
| <b>Socio-economic status</b>                                                                            | Deprived     | 82267 (67.46%)                  | 22726 (65.30%)                    |
|                                                                                                         | Affluent     | 39680 (33.54%)                  | 12079 (34.70%)                    |
|                                                                                                         | missing      | 3196                            | 732                               |
| <b>Comorbid Condition</b>                                                                               | One          | 101219 (80.88%)                 | 27356 (76.99%)                    |
|                                                                                                         | Two          | 21666 (17.32%)                  | 7410 (20.85%)                     |
|                                                                                                         | Three        | 2258 (1.80%)                    | 771 (2.16%)                       |
|                                                                                                         | missing      | 0                               | 0                                 |
| <b>Systolic Blood Pressure</b>                                                                          | Mean (SD)    | 133.9 (18.30)                   | 133 (17.54)                       |
|                                                                                                         | Median (IQR) | 133 (23)                        | 132 (22)                          |
|                                                                                                         | missing      |                                 |                                   |
| <b>Diastolic Blood Pressure</b>                                                                         | Mean (SD)    | 75.57 (10.74)                   | 74.57 (10.32)                     |
|                                                                                                         | Median (IQR) | 76 (11)                         | 75 (11)                           |
|                                                                                                         | missing      |                                 |                                   |
| <b>Body Mass Index</b>                                                                                  | Mean (SD)    | 29.06 (6.22)                    | 28.95 (6.02)                      |
|                                                                                                         | Median (IQR) | 28.26 (7.37)                    | 28.09 (7.10)                      |
|                                                                                                         | missing      |                                 |                                   |
| <b>Total Cholesterol</b>                                                                                | Mean (SD)    | 4.43 (1.12)                     | 4.31 (1.05)                       |
|                                                                                                         | Median (IQR) | 4.30 (1.3)                      | 4.2 (1.2)                         |
|                                                                                                         | missing      |                                 |                                   |
| <b>HbA1c</b>                                                                                            | Mean (SD)    | 7.72 (1.82)                     | 7.52 (1.68)                       |
|                                                                                                         | Median (IQR) | 7.30 (2.2)                      | 7.1 (1.8)                         |
|                                                                                                         | missing      |                                 |                                   |

**Systolic Blood Pressure (SBP)-Additional Analysis**

**Table 2: Title: Comparison of results of multiple logistic regression for outcome of concurrent depressive symptoms (HADS-D>7) with and without extreme values for Systolic Blood Pressure.** Legend: SBP: Systolic Blood Pressure. Regression 1a shows the regression of analyzed data after excluding extreme values for SBP (SBP <90 mm Hg and SBP >240 mm Hg). Regression 1b shows results of data including extreme values.

| Variable                             | Regression 1a- Analyzed Data without extreme values N=32029 |         | Regression 1b- All available data including extreme values N=32139 |         |
|--------------------------------------|-------------------------------------------------------------|---------|--------------------------------------------------------------------|---------|
|                                      | Odds Ratio with 95% Confidence Interval                     | p-value | Odds Ratio with 95% Confidence Interval                            | p-value |
| <b>SBP</b>                           | 0.96 (0.94-0.97)                                            | <0.001  | 0.96 (0.94-0.97)                                                   | <0.001  |
| <b>SBP ^2</b>                        | 1.00013 (1.00008-1.00018)                                   | <0.001  | 1.00013 (1.00008-1.00018)                                          | <0.001  |
| <b>Age Group(65-90)</b>              | 0.57 (0.53-0.60)                                            | <0.001  | 0.57 (0.53-0.60)                                                   | <0.001  |
| <b>Sex (Male)</b>                    | 0.82 (0.77-0.87)                                            | <0.001  | 0.82 (0.77-0.87)                                                   | <0.001  |
| <b>Deprivation Status (Affluent)</b> | 0.50 (0.46-0.53)                                            | <0.001  | 0.50 (0.46-0.53)                                                   | <0.001  |
| <b>Co-morbid Conditions</b>          |                                                             |         |                                                                    |         |
| <b>Two</b>                           | 1.45 (1.36-1.56)                                            | <0.001  | 1.45 (1.36-1.55)                                                   | <0.001  |
| <b>Three</b>                         | 1.65 (1.37-1.94)                                            | <0.001  | 1.65 (1.38-1.96)                                                   | <0.001  |

**Table 3: Title: Statistical significance of interaction between Systolic Blood Pressure and various demographic factors in multiple logistic regression for outcome of concurrent depressive symptoms (HADS-D >7).** Legend: SBP: Systolic Blood Pressure

|                                 | Regression 1a- Analyzed Data without extreme values N=32029 |
|---------------------------------|-------------------------------------------------------------|
| <b>Interaction</b>              | p-value                                                     |
| <b>SBP: Age Group</b>           | 0.42                                                        |
| <b>SBP: Deprivation Status</b>  | 0.06                                                        |
| <b>SBP: Sex</b>                 | 0.12                                                        |
| <b>SBP: Co-morbid Condition</b> |                                                             |
| <b>Two</b>                      | 0.67                                                        |
| <b>Three</b>                    | 0.70                                                        |

**Diastolic Blood Pressure (DBP)-Additional Analysis**

**Table 4: Title: Comparison of results of multiple logistic regression for outcome of concurrent depressive symptoms (HADS-D>7) with and without extreme values for Diastolic Blood Pressure.** Legend: DBP: Diastolic Blood Pressure. Regression 2a shows the regression of analyzed data after excluding extreme values for DBP (SBP <50 mm Hg and SBP >130 mm Hg). Regression 2b shows results of data including extreme values.

| Variable                             | Regression 2a- Analyzed Data without extreme values N=31972 |         | Regression 2b- All available data including extreme values N=32139 |         |
|--------------------------------------|-------------------------------------------------------------|---------|--------------------------------------------------------------------|---------|
|                                      | Odds Ratio with 95% Confidence Interval                     | p-value | Odds Ratio with 95% Confidence Interval                            | p-value |
| <b>DBP</b>                           | 0.95 (0.93-0.98)                                            | 0.001   | 0.96 (0.94-0.99)                                                   | 0.005   |
| <b>DBP ^2</b>                        | 1.0002 (1.0001-1.0004)                                      | 0.001   | 1.0002 (1.00007-1.0003)                                            | 0.003   |
| <b>Age Group(65-90)</b>              | 0.56 (0.53-0.60)                                            | <0.001  | 0.56 (0.53-0.60)                                                   | <0.001  |
| <b>Sex (Male)</b>                    | 0.82 (0.77-0.87)                                            | <0.001  | 0.82 (0.77-0.87)                                                   | <0.001  |
| <b>Deprivation Status (Affluent)</b> | 0.49 (0.46-0.53)                                            | <0.001  | 0.50 (0.46-0.53)                                                   | <0.001  |
| <b>Co-morbid Conditions</b>          |                                                             |         |                                                                    |         |
| <b>Two</b>                           | 1.46 (1.36-1.56)                                            | <0.001  | 1.47 (1.37-1.57)                                                   | <0.001  |
| <b>Three</b>                         | 1.64 (1.38-1.95)                                            | <0.001  | 1.64 (1.37-1.94)                                                   | <0.001  |

**Table 5: Title: Statistical significance of interaction between Diastolic Blood Pressure and various demographic factors in multiple logistic regression for outcome of concurrent depressive symptoms (HADS-D >7).** Legend: DBP: Diastolic Blood Pressure

|                                 | Regression 2a- Analyzed Data without extreme values N=31972 |
|---------------------------------|-------------------------------------------------------------|
| <b>Interaction Term</b>         | p-value                                                     |
| <b>DBP: Age Group</b>           | 0.23                                                        |
| <b>DBP: Deprivation Status</b>  | 0.85                                                        |
| <b>DBP: Sex</b>                 | <b>0.01 (Significant)</b>                                   |
| <b>DBP: Co-morbid Condition</b> |                                                             |
| <b>Two</b>                      | 0.55                                                        |
| <b>Three</b>                    | 0.93                                                        |

**Figure 1: Title: Relationship between Diastolic Blood Pressure (DBP) and probability of having HADS-D positive with 95% confidence intervals with sub-group analysis for males and females.**

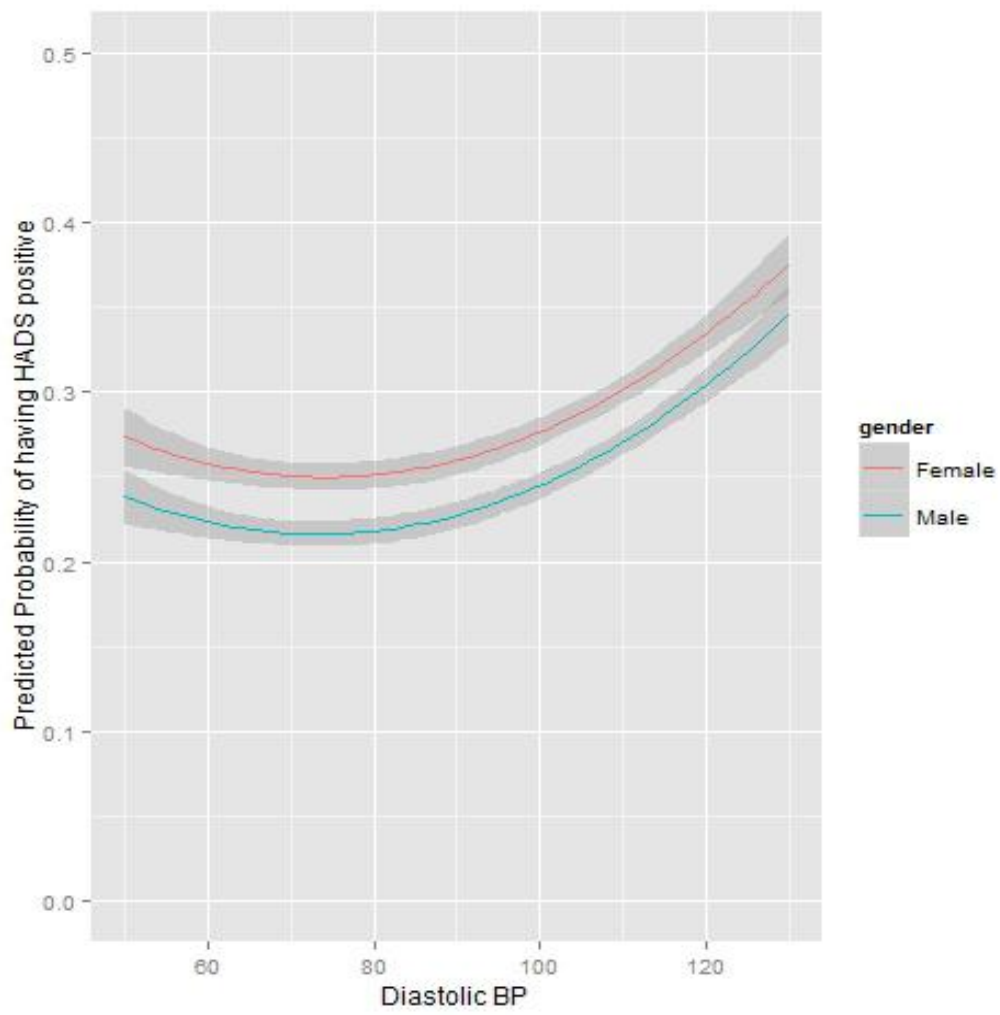

**Total Cholesterol-Additional Analysis**

**Table 6: Title: Comparison of results of multiple logistic regression for outcome of concurrent depressive symptoms (HADS-D>7) with and without extreme values for Total Cholesterol.**

Legend: Regression 3a shows the regression of analyzed data after excluding extreme values for Total Cholesterol (Total Cholesterol < 2 mmol/l and Total Cholesterol > 10 mmol/l). Regression 3b shows results of data including extreme values.

| Variable                             | Regression 3a- Analyzed Data without extreme values N=31244 |         | Regression 3b- All available data including extreme values N=31311 |         |
|--------------------------------------|-------------------------------------------------------------|---------|--------------------------------------------------------------------|---------|
|                                      | Odds Ratio with 95% Confidence Interval                     | p-value | Odds Ratio with 95% Confidence Interval                            | p-value |
| <b>Cholesterol</b>                   | 0.79 (0.69-0.92)                                            | 0.008   | 0.88 (0.78-1.00)                                                   | 0.06    |
| <b>Cholesterol ^2</b>                | 1.03 (1.01-1.04)                                            | 0.002   | 1.019 (1.007-1.032)                                                | 0.003   |
| <b>Age Group(65-90)</b>              | 0.57 (0.54-0.61)                                            | <0.001  | 0.57 (0.54-0.61)                                                   | <0.001  |
| <b>Sex (Male)</b>                    | 0.85 (0.80-0.90)                                            | <0.001  | 0.85 (0.80-0.90)                                                   | <0.001  |
| <b>Deprivation Status (Affluent)</b> | 0.50 (0.46-0.53)                                            | <0.001  | 0.50 (0.46-0.53)                                                   | <0.001  |
| <b>Co-morbid Conditions</b>          |                                                             |         |                                                                    |         |
| <b>Two</b>                           | 1.50 (1.40-1.60)                                            | <0.001  | 1.50 (1.40-1.60)                                                   | <0.001  |
| <b>Three</b>                         | 1.74 (1.45-2.07)                                            | <0.001  | 1.75 (1.46-2.09)                                                   | <0.001  |

**Table 7: Title: Statistical significance of interaction between Total Cholesterol and various demographic factors in multiple logistic regression for outcome of concurrent depressive symptoms (HADS-D >7)**

| Interaction Term                        | Regression 3a- Analyzed Data without extreme values N=31244 |
|-----------------------------------------|-------------------------------------------------------------|
|                                         | p-value                                                     |
| <b>Cholesterol: Age Group</b>           | 0.22                                                        |
| <b>Cholesterol: Deprivation Status</b>  | 0.17                                                        |
| <b>Cholesterol: Sex</b>                 | 0.65                                                        |
| <b>Cholesterol: Co-morbid Condition</b> |                                                             |
| <b>Two</b>                              | 0.63                                                        |
| <b>Three</b>                            | 0.95                                                        |

**Body Mass Index-Additional Analysis**

**Table 8: Title: Comparison of results of multiple logistic regression for outcome of concurrent depressive symptoms (HADS-D>7) with and without extreme values for Body Mass Index.**

Legend: BMI: Body Mass Index. Regression 4a shows the regression of analyzed data after excluding extreme values for BMI (BMI < 15 kg/m<sup>2</sup> and BMI > 55 kg/m<sup>2</sup>). Regression 4b shows results of data including extreme values.

| Variable                             | Regression 4a- Analyzed Data without extreme values N=30042 |         | Regression 4b- All available data including extreme values N=30139 |         |
|--------------------------------------|-------------------------------------------------------------|---------|--------------------------------------------------------------------|---------|
|                                      | Odds Ratio with 95% Confidence Interval                     | p-value | Odds Ratio with 95% Confidence Interval                            | p-value |
| <b>BMI</b>                           | 0.85 (0.82-0.88)                                            | < 0.001 | 0.96 (0.94-0.98)                                                   | 0.009   |
| <b>BMI ^2</b>                        | 1.002 (1.001-1.003)                                         | < 0.001 | 1.0006 (1.00003-1.0009)                                            | < 0.001 |
| <b>Age Group(65-90)</b>              | 0.57 (0.53-0.61)                                            | <0.001  | 0.56 (0.52-0.60)                                                   | <0.001  |
| <b>Sex (Male)</b>                    | 0.87 (0.82-0.92)                                            | <0.001  | 0.85 (0.80-0.90)                                                   | <0.001  |
| <b>Deprivation Status (Affluent)</b> | 0.52 (0.48-0.55)                                            | <0.001  | 0.52 (0.48-0.55)                                                   | <0.001  |
| <b>Co-morbid Conditions</b>          |                                                             |         |                                                                    |         |
| <b>Two</b>                           | 1.50 (1.40-1.60)                                            | <0.001  | 1.49 (1.39-1.60)                                                   | <0.001  |
| <b>Three</b>                         | 1.80 (1.51-2.13)                                            | <0.001  | 1.78 (1.49-2.11)                                                   | <0.001  |

**Table 9: Title: Statistical significance of interaction between Body Mass Index and various demographic factors in multiple logistic regression for outcome of concurrent depressive symptoms (HADS-D >7).** Legend: BMI: Body Mass Index

|                                 | Regression 4a- Analyzed Data without extreme values N=30042 |
|---------------------------------|-------------------------------------------------------------|
| <b>Interaction Term</b>         | p-value                                                     |
| <b>BMI: Age Group</b>           | <b>0.009 (Significant)</b>                                  |
| <b>BMI: Deprivation Status</b>  | 0.13                                                        |
| <b>BMI: Sex</b>                 | 0.07                                                        |
| <b>BMI: Co-morbid Condition</b> |                                                             |
| <b>Two</b>                      | 0.06                                                        |
| <b>Three</b>                    | 0.40                                                        |

**Figure 2: Title: Relationship between Body Mass Index (BMI) and probability of having HADS-D positive with 95% confidence intervals with sub-group analysis for the two age-groups.**

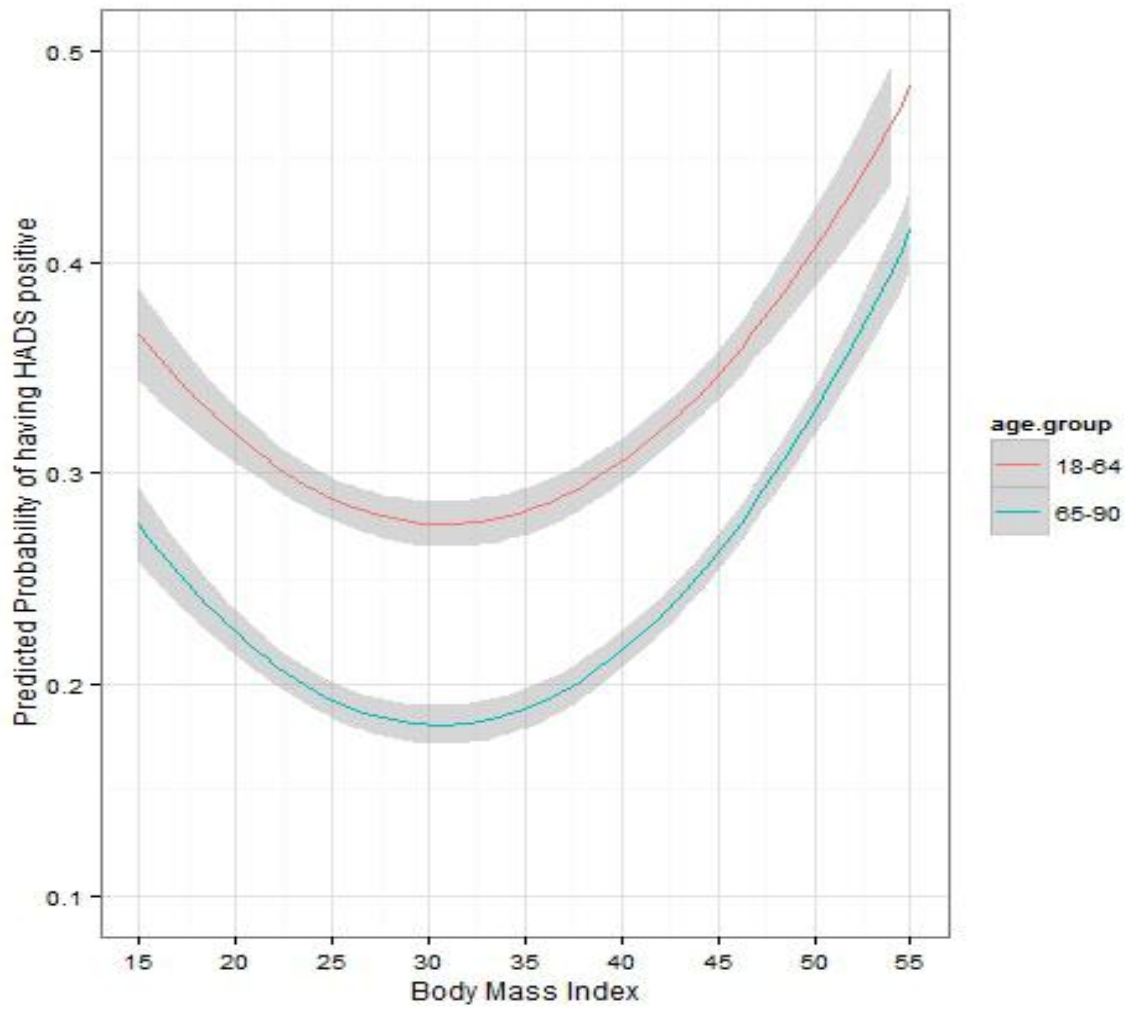

**HbA1c-Additional Analysis**

**Table 10: Title: Comparison of results of multiple logistic regression for outcome of concurrent depressive symptoms (HADS-D>7) with and without extreme values for HbA1c.** Legend: Regression 5a shows the regression of analyzed data after excluding extreme values for HbA1c (HbA1c < 3 DCCT and HbA1c>18 DCCT). Regression 5b shows results of data including extreme values.

| Variable                             | Regression 5a- Analyzed Data without extreme values N=15676 |         | Regression 5b- All available data including extreme values N=15678 |         |
|--------------------------------------|-------------------------------------------------------------|---------|--------------------------------------------------------------------|---------|
|                                      | Odds Ratio with 95% Confidence Interval                     | p-value | Odds Ratio with 95% Confidence Interval                            | p-value |
| <b>HbA1c</b>                         | 0.82 (0.70-0.95)                                            | 0.01    | 0.82 (0.71-0.96)                                                   | 0.01    |
| <b>HbA1c^2</b>                       | 1.014 (1.005-1.022)                                         | 0.001   | 1.014 (1.005-1.022)                                                | 0.001   |
| <b>Age Group(65-90)</b>              | 0.58 (0.53-0.63)                                            | <0.001  | 0.58 (0.53-0.63)                                                   | <0.001  |
| <b>Sex (Male)</b>                    | 0.82 (0.76-0.89)                                            | <0.001  | 0.82 (0.76-0.89)                                                   | <0.001  |
| <b>Deprivation Status (Affluent)</b> | 0.52 (0.48-0.58)                                            | <0.001  | 0.52 (0.48-0.58)                                                   | <0.001  |
| <b>Co-morbid Conditions</b>          |                                                             |         |                                                                    |         |
| <b>Two</b>                           | 1.68 (1.40-1.60)                                            | <0.001  | 1.68 (1.40-1.60)                                                   | <0.001  |
| <b>Three</b>                         | 1.99 (1.51-2.13)                                            | <0.001  | 1.99 (1.51-2.13)                                                   | <0.001  |

**Table 11: Title: Statistical significance of interaction between Body Mass Index and various demographic factors in multiple logistic regression for outcome of concurrent depressive symptoms (HADS-D >7).**

| Interaction Term                  | Regression 5a- Analyzed Data without extreme values N=15676 |
|-----------------------------------|-------------------------------------------------------------|
|                                   | p-value                                                     |
| <b>HbA1c: Age Group</b>           | 0.28                                                        |
| <b>HbA1c: Deprivation Status</b>  | 0.22                                                        |
| <b>HbA1c: Sex</b>                 | 0.08                                                        |
| <b>HbA1c: Co-morbid Condition</b> |                                                             |
| <b>Two</b>                        | 0.45                                                        |
| <b>Three</b>                      | 0.92                                                        |
